# Supplementary material
Source: publisher figshare collection journal article supplement (https://frontiersin.figshare.com/ndownloader/files/15222134)
Supplement: Supplementary file 1 [file 15222134]

## *Supplementary Material*

### **Grey Reef Sharks**

Nonlinear mixed-effects model fit by maximum likelihood

Model: value ~ SSlogis(ordmonth, Asym, xmid, scal)

Data: data1

|          |          |           |
|----------|----------|-----------|
| AIC      | BIC      | logLik    |
| 3126.346 | 3149.177 | -1557.173 |

Random effects:

Formula: Asym ~ 1 | factor(TagID)

|         |                  |          |
|---------|------------------|----------|
|         | Asym.(Intercept) | Residual |
| StdDev: | 105.4017         | 21.42753 |

Fixed effects: list(Asym ~ mcpMax, xmid + scal ~ 1)

|                  | Value    | Std.Error | DF  | t-value   | p-value |
|------------------|----------|-----------|-----|-----------|---------|
| Asym.(Intercept) | 43.22887 | 35.22005  | 303 | 1.227394  | 0.2206  |
| Asym.mcpMax      | 0.00031  | 0.00196   | 303 | 0.157460  | 0.8750  |
| xmid             | 2.96390  | 0.11853   | 303 | 25.005249 | 0.0000  |
| scal             | 0.89745  | 0.10211   | 303 | 8.789328  | 0.0000  |

Correlation:

|             | As.(I) | Asym.M | xmid  |
|-------------|--------|--------|-------|
| Asym.mcpMax | -0.806 |        |       |
| xmid        | 0.014  | -0.007 |       |
| scal        | 0.013  | -0.006 | 0.121 |

Standardized Within-Group Residuals:

| Min         | Q1          | Med         | Q3         | Max         |
|-------------|-------------|-------------|------------|-------------|
| -8.72470999 | -0.03239218 | -0.01820643 | 0.07346520 | 11.77496839 |

Number of Observations: 332

Number of Groups: 26

Table S1. Effect of array size on estimates of space use of Grey Reef Sharks. Summary statistics of a non-linear mixed effect models of the monthly dBBMM KUD estimates of the grey reef shark as a function of month and the minimum convex polygon (MCP) of the array receiver locations. For each individual (TagID) we tested the effect of the largest MCP where the shark was detected. The model summary shows that the effect of the MCP on the asymptote (Asym) is not statistically significant at the 95% confidence level.

**Silvertip Sharks**

Nonlinear mixed-effects model fit by maximum likelihood

Model: value ~ SSlogis(ordmonth, Asym, xmid, scal)

Data: data1

|          |         |           |
|----------|---------|-----------|
| AIC      | BIC     | logLik    |
| 5093.807 | 5118.02 | -2540.904 |

Random effects:

Formula: Asym ~ 1 | factor(TagID)

|         |                  |          |
|---------|------------------|----------|
|         | Asym.(Intercept) | Residual |
| StdDev: | 260.4833         | 90.286   |

Fixed effects: list(Asym ~ mcpMax, xmid + scal ~ 1)

|                  | Value    | Std.Error | DF  | t-value   | p-value |
|------------------|----------|-----------|-----|-----------|---------|
| Asym.(Intercept) | 278.6502 | 64.17037  | 382 | 4.342350  | 0.000   |
| Asym.mcpMax      | -0.00495 | 0.00595   | 382 | -0.831909 | 0.406   |
| xmid             | 3.69469  | 0.17956   | 382 | 20.576783 | 0.000   |
| scal             | 1.62194  | 0.16811   | 382 | 9.648115  | 0.000   |

Correlation:

|             | As.(I) | Asym.M | xmid  |
|-------------|--------|--------|-------|
| Asym.mcpMax | -0.692 |        |       |
| xmid        | 0.071  | -0.015 |       |
| scal        | 0.058  | -0.014 | 0.252 |

Standardized Within-Group Residuals:

| Min         | Q1          | Med         | Q3         | Max        |
|-------------|-------------|-------------|------------|------------|
| -4.24126378 | -0.20676467 | -0.03402898 | 0.09917892 | 6.52271866 |

Number of Observations: 418

Number of Groups: 33

Table S2. Effect of array size on estimates of space use of Silvertip Sharks. Summary statistics of a non-linear mixed effect models of the monthly dBMM KUD estimates of the silvertip shark as a function of month and the minimum convex polygon (MCP) of the array receiver locations. For each individual (TagID) we tested the effect of the largest MCP where the shark was detected. The model summary shows that the effect of the MCP on the asymptote (Asym) is not statistically significant at the 95% confidence level.

| Term                       | Estimate | SD    | Z<br>statistic | P value |
|----------------------------|----------|-------|----------------|---------|
| (Intercept)                | 0.81     | 0.336 | 2.412          | 0.016   |
| Distance                   | -0.126   | 0.019 | -6.512         | <0.001  |
| Species.Silvertip          | 0.276    | 0.405 | 0.682          | 0.495   |
| Distance:Species.Silvertip | 0.042    | 0.021 | 1.968          | 0.049   |

Table S3: Model parameters for binomial GLM regression of tag detection probability against receiver distance from tagging location (Distance) and species (factor, Silvertip = 1).

| Species   | Mean speed (m/s) | N  | Days monitored | Median detection gap (min) | Tags exiting | Total exits | Exits per tag | Days between exits |
|-----------|------------------|----|----------------|----------------------------|--------------|-------------|---------------|--------------------|
| Grey reef | 0.63             | 61 | 16,601         | 2.1                        | 32           | 148         | 2.6           | 112.2              |
| Silvertip | 0.73             | 60 | 22,188         | 3.5                        | 47           | 206         | 3.3           | 107.7              |

Table S4: Potential exits from the BIOT MPA based on gaps in acoustic detection, by species. ‘Exits’ assume animals travelled in straight lines from their last detection point to the MPA boundary between consecutive detections. Cruising speeds taken from Ryan et al. Mar Biol. 2015; 162(6):1307–18.

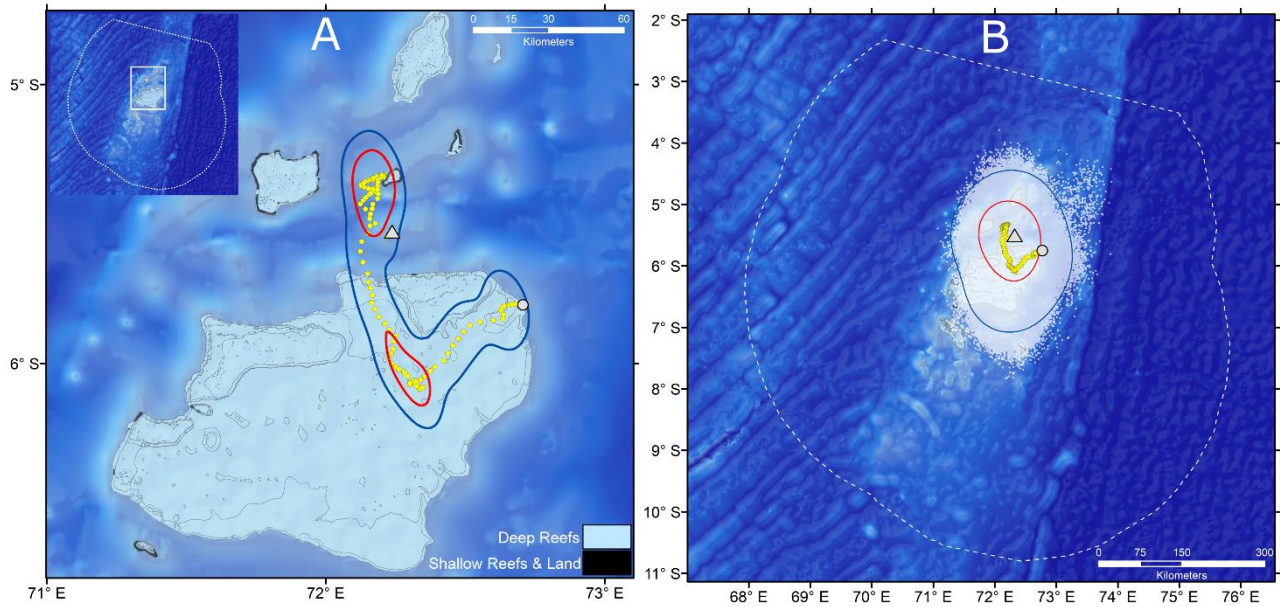

Figure S1: Example of different estimates of kernel utilization distributions (KUD) for Silvertip Shark 3914018. A) The SSM track (most probable track, yellow circles) and its 95% (blue contour) and 50% (red contour) KUD. The SSM takes into account geolocation uncertainty in reconstructing this track, however this KUD is for the modelled track and does not take into account uncertainty for each position. B) SSM track (yellow circles, most probable track), the full posterior distribution (white points, all estimated possible positions for each daily geolocation) from the SSM model used to estimate the most probable track, and the KUDs of the full posterior distribution. This KUD takes into account the uncertainty used in modelling the most probably track. Tagging location shown with white triangle, pop-off location is white circle. MPA boundary is shown with the dashed white line.

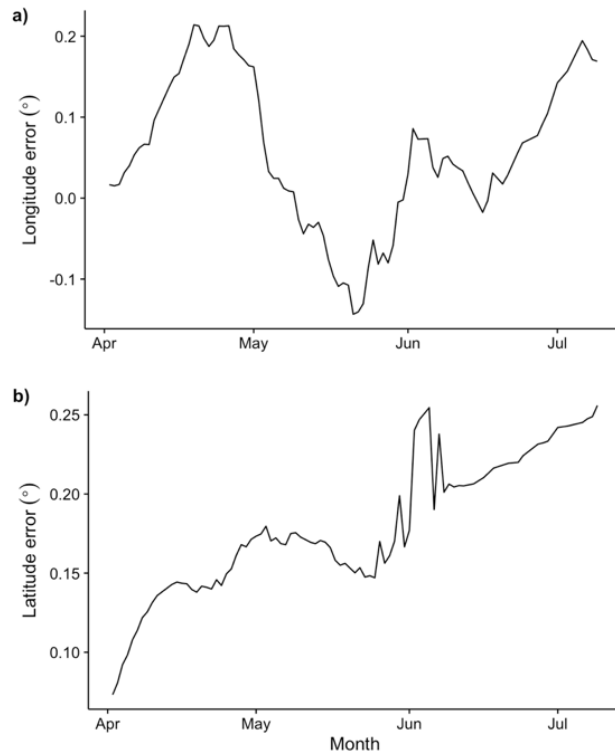

Figure S2: Error in degrees of latitude and longitude between daily SSM estimates of shark position and mean daily location as determined by concurrent acoustic receiver detections.

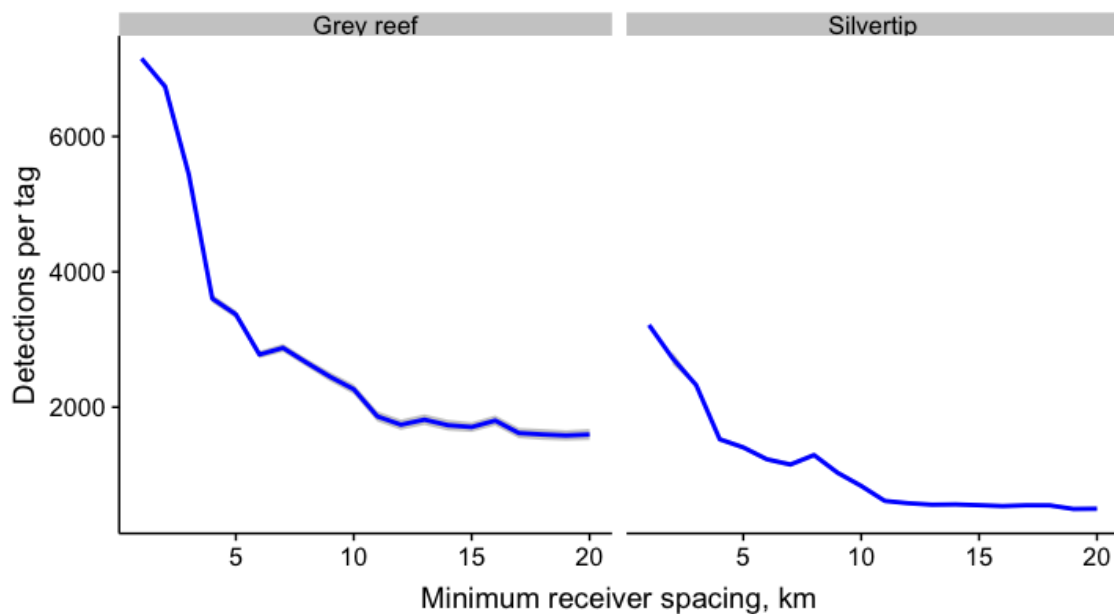

Figure S3: Mean detections per tag for Grey Reef and Silvertip Sharks vs acoustic receiver spacing.
